# Supplementary material for: QUBIC2: a novel and robust biclustering algorithm for analyses and interpretation of large-scale RNA-Seq data
Source: Oxford University Press journal article supplement (doi:10.1093/bioinformatics/btz692), 2019-09-06
Supplement: btz692_supplementary_data.docx [file btz692_supplementary_data.docx]

**QUBIC2: A novel and robust biclustering algorithm for analyses and interpretation of large-scale RNA-Seq data**

Juan Xie1, Anjun Ma1, Yu Zhang2, Bingqiang Liu3, Sha Cao4, Cankun Wang1, Jennifer Xu1,5, Chi Zhang6, *, Qin Ma1, *

1Department of Biomedical Informatics, College of Medicine, The Ohio State University, Columbus, OH, 43210, USA

2Colleges of Computer Science and Technology, Jilin University, Changchun,130012, China,

3School of Mathematics, Shandong University, Jinan, 250100, China

4Department of Biostatistics, Indiana University, School of Medicine, Indianapolis, IN, 46202, USA

5Department of Biostatistics, Gillings School of Global Public Health, University of North Carolina at Chapel Hill, Chapel Hill, NC,27599, USA

6Department of Medical & Molecular Genetics, Indiana University, School of Medicine, Indianapolis, IN, 46202, USA

*To whom correspondence should be addressed. Tel: +1 706-254-4293; Email: qin.ma@osumc.edu. Correspondence is also addressed to Chi Zhang. Tel: +1 317-278-9625; Email: [czhang87@iu.edu](mailto:czhang87@iu.edu).

**Supplementary Note S1: Definition of locally low-rank biclusters**

With fitting each gene’s expression by the LTMG model, we transformed the continuous gene expression into a binary matrix with 1s in each row representing one expression state of a certain gene. Then each of the identified 1-enriched submatrices corresponds to a group of genes, of which the expression of each consistently falls in one Gaussian peak in a certain subset of samples. Hence the bicluster is an approximation of the local rank-1 submatrix defined in the following way.

Suppose is the observed data matrix with rows and columns representing genes and samples, and assume the entries of are independent but non-identical Gaussian distributed, i.e., . There exist a significant number of hidden submatrices such that the means and variances of each entry of these submatrices may be different from the white noise distribution:

**Figure S1**. Performance comparison of eight biclustering tools on microarray and RNA-Seq data from *E. coli*, respectively. Each tool was run multiple times with different parameter combinations. The performance was evaluated using *f*-score, the harmonic mean of precision and recall. Pathway enrichment analysis was conducted against 1,826 SEED subsystems derived from the SEED genomic database. It is noteworthy that although the performance of Plaid, QUBIC, and Runibic on RNA-Seq data is better than on microarray, there is still large room for improvement.

**Supplementary Note S2: Unquantifiable errors**

A log-normal error is always used for normalized gene expression, such as RPKM, CPM, and TPM, in tissue RNA-Seq data analysis. A similar assumption of the errors is also used in the mixture model of scRNA-Seq data, such as the zero-inflated Gaussian model used in MAST (Finak, et al., 2015), Gamma-Normal model used in scImpute (Li and Li, 2018) and the two states model used in SC2P (Wu, et al., 2018). However, the error of low expression part, including zero and low non-zero expression, is not fixed due to it depending on multiple factors including, experimental resolution, un-fully degraded mRNA and sequencing errors. In order to optimize the inference of multimodality of the high expression part in a gene's expression profile, we used a left-censored assumption for the “unquantifiable errors” of zero and low expression in LTMG model.

**Supplementary Method S1: Simulation of co-regulated gene expression data**

We utilized a single-cell RNA-Seq dataset of human melanoma (Tirosh, et al., 2016) (with 22,846 genes and 4,645 cells) to simulate bulk tissue RNA-Seq data with known co-regulated modules. Specifically, a single cell RNA-Seq pool consisting of counts data of 4,466 cells of six annotated cell types, namely B-, T-, endothelial, fibroblast, macrophage, and cancer cells, was constructed. The top 1,000 cell type-specific expressed genes of each cell type were identified by using the Z- score of the mean of each gene’s expression level in each cell type.

For each round of the simulation, the number of bulk tissue samples and co-regulation modules to be simulated is first defined. Then the genes of each co-regulation module, denoted as , is specified by randomly selecting genes from the top 1,000 cell type-specific expressed genes of one cell type. A co-regulation strength matrix is then simulated from a bimodal distribution over (0,1), with denoting the proportion of cells with the transcriptional regulatory signal of co-regulation module in bulk sample . A bulk tissue data is simulated by randomly drawing cells from the cell pool by following a multinomial distribution with predefined parameters and the total number of cells. For co-regulation module in bulk sample , genes in a proportion of the selected cells of the cell type corresponding to are perturbed by an X-fold increase of the gene expression. Then the bulk data with simulated co-regulations are formed by summing the perturbed gene expression profile for the selected cells and normalized to RPKM expression scale.

The rationales of this simulation approach include (1) gene expression level and noise in the bulk data are purely simulated by sum of real single-cell data without using artificially assigned expression scale and noise; (2) co-regulation genes are modeled as a specific fold increase of a number of cell-type-specific genes in a particular subset of the cells, which characterizes the heterogeneity of transcriptional regulation among cells in a tissue; (3) multiple co-regulation modules in specific to different cell types can be simultaneously simulated. Hence, we believe the gene expression data simulated by this way can satisfactorily reflect genes co-regulated by a perturbed transcriptional regulation signal in real bulk tissue data. The pseudo-code of simulation is provided as follows:

Note that there are many simulators to generate RNA-Seq data, yet none of them can generate co-regulated modules. A summary of existing simulators is shown in Table S1.

**Table S1. A summary of existing RNA-Seq data simulators**

| **Simulator** | **Description** | **Input & Output** | **Advantage** |
| --- | --- | --- | --- |
| Polyester | R package designed to simulate RNA-seq data; | Input: annotated transcript nucleotide sequences  Output: RNA-seq reads | the ability to simulate reads indicating isoform-level differential expression across biological replicates for a variety of experimental designs. |
| BEERS | a simulation engine for generating RNA-Seq data; | Input: a pool of gene models and feature quantifications file  Output: DNA and protein sequence alignment | generates simulated sequence read pairs with characteristics similar to those observed in Illumina sequence reads. |
| FUSIM | simulates fusion transcripts | Input: Number of fusion transcripts to generate, gene model, faidx-indexed reference genome, RNA-seq read alignments  Output: Raw fusion sequences | assemble a dataset of fusion transcripts useful for testing and benchmarking applications in fusion gene discovery, and enables comprehensive testing in silico of fusion discovery methods in transcriptome sequencing data |
| RSS | part of USeq, a collection of tools for high-level analysis of NGS data | Input: SAM alignment file  Output: a sequence file | Simulates over-dispersed, multiple replica, differential, non-stranded RNA-Seq datasets |
| SimSeq | a nonparametric simulation algorithm | Input: a large source RNA-seq dataset  Output: matrix of RNA-seq read counts | gives a more accurate picture of the performance of a given method to detect differential expression while controlling FDR |
| ART | general simulator | Input: DNA sequence  Output: sequencing reads that mimic the technology-specific sequencing process | deals with all major sequencing platforms and generates sequence reads with both substitution and insertion-deletion (INDEL) errors |
| pIRS | Profile-based Illumina pair-end reads simulator | Output: pair-end reads | simulates Illumina reads with real error and quality distributions and coverage bias |
| SimCT | a configurable generator that simulates RNA-Seq data from a reference genome and known transcript annotations | Input: reference genome and known transcript annotation  Output: RNA-Seq reads | supplies data sets that cover cases such as fusion genes. It includes the alignment positions and errors of the simulated reads in their names |
| TABASCO | a single-molecule stochastic gene expression simulator | Input: an XML file that describes and parameterizes the relevant genetic elements, initial conditions, and any other reactions that occur  Output: gene expression | Allows genome-scale simulation of transcription and translation at the individual molecule and single base-pair resolution |
| RSSS | A software tool to simulate transcript sets, expression values, and sequence reads | Input: transcript pool(Ensembl 66 cDNA sequences )  Output: expression value, RNA-Seq reads and transcript annotation |  |
| Pinetree | a step-wise gene expression simulator | Input: a single copy of a genome, and a pool of free polymerases and ribosomes  Output: gene expression | simulates dynamic transcript abundances and transcript lengths; ribosome movements are modeled explicitly on each transcript |
| sgnesR | Stochastic gene Network Expression Simulator | Input: gene network  Output: gene expression matrix | generates biologically realistic gene expression data based on an underlying gene regulatory network |
| quantroSim | An R-package to simulate gene expression and DNA methylation data | Input: parameters indicating the number of genes, groups as well as fold  Output: gene expression | simulates RNA transcripts counts based on Poisson distribution |
| exPatGen | an on-line simulator, to generate dynamic gene expression patterns typical of microarray experiments | Input: Expression Model Parameters, Gene Groupings, &  Regulatory Networks  Output: gene mRNA levels | Generating simulated expression patterns with known biological features of expression complexity, diversity, and interconnectivity; provides a more controlled means of investigating the appropriateness of different analysis methods |
| PROSSTT | probabilistic simulation of single-cell RNA-seq data for complex differentiation processes | Input: parameters that describe the topology of the lineage tree  Output: UMI counts | simulates scRNA-seq datasets for differentiation processes with lineage trees of any desired complexity, noise level, noise model, and size. |

**Table S2. The summary of datasets used in the study**

| **Datasets** | | **#genes** | **# conditions** | **Download links** | **Note** |
| --- | --- | --- | --- | --- | --- |
| Simulation | simu1 | 22,846 | 100 | http://bmbl.sdstate.edu/downloadFiles/simulation/ | Used in Figure 2 |
| simu2 | 22,846 | 100 | http://bmbl.sdstate.edu/downloadFiles/simulation/ | Used in Figure 2 |
| Microarray | *E. coli* | 4,297 | 466 | http://m3d.mssm.edu/norm/E_coli_v4_Build_6.tar.gz | Used in Figure2 |
| Human_SEEK | 4,436 | 2,308 | https://doi.org/10.5281/zenodo.1157938 | An aggregation of public datasets using the GPL5175 microarray platform. Used in Figure2 |
| RNA-Seq | *E. coli* | 4,497 | 155 | http://bmbl.sdstate.edu/downloadFiles/E.coli%20RNA-seq/ | Used in Figure2 |
| Human_GTEX | 5,177 | 8,555 | https://doi.org/10.5281/zenodo.1157938 | From 53 tissues of 544 donors. Used in Figure2 |
| scRNA-Seq | Yan’s data  (GSE36552) | 20,214 | 90 | https://scrnaSeq-public-datasets.s3.amazonaws.com/manual-data/yan/nsmb.2660-S2.csv | Human;  Used in Figure 2, 3 |
| 10X Genomics data | 16,634 | 2,700 | https://support.10xgenomics.com/single-cell-gene-expression/datasets/1.1.0/pbmc3k | Human; Used in Figure2 |
|  | Regulon for simulated data | 2,240 | - | https://github.com/qibaotu/QUBIC2_validation | 10 and 30 regulons, respectively. For the validation of simulated data (Figure 2) |
| ComTF | 1,798 | - | https://github.com/qibaotu/QUBIC2_validation | 457 ComTF. For the validation of *E. coli* RNA-Seq data (Figure 4) |
| KEGG | 1,423 | - | https://github.com/qibaotu/QUBIC2_validation | 123 KEGG pathways. For the validation of *E. coli* microarray and RNA-Seq data (Figure 2 and 4) |
| TF | 1,800 | - | https://github.com/qibaotu/QUBIC2_validation | 204 regulons. For the validation of *E. coli* RNA-Seq data (Figure 4) |
| SEED | 1,826 | - | https://github.com/qibaotu/QUBIC2_validation | 316 SEED pathways. For the validation of *E. coli* RNA-Seq data (Figure 4) |
| ECO | 1,068 | - | https://github.com/qibaotu/QUBIC2_validation | 425 EcoCyc pathways. For the validation of *E. coli* RNA-Seq data (Figure 4) |
| Regulon for Human_SEEK | 4,017 | - | https://zenodo.org/record/1157938 | 634 regulons. For the validation of Human_SEEK data |
| Regulon for Human_GTEX | 4,782 | - | https://zenodo.org/record/1157938 | 634 regulons. For the validation of Human_GTEX data |
| ChIP-Seq data | 23,951 | - | http://bmbl.sdstate.edu/chip-seq/ | 655 ChIP-Seq. For the validation of Yan’s data and 10X Genomics data (Figure 2) |

**Supplementary Method S2: EM algorithm to fit the LTMG***.*

Latent variables are introduced to estimate by the following *Q* function and EM algorithm:

where are the parameters, is the cutoff of the measured gene expression level of X to have reliable Gaussian errors, is the measured gene expression level of X, i.e., log scaled RPKM value in cell , is the latent variable reflecting the real expression level of X if the measured expression level is smaller than , and is the latent variable reflecting that is the from the th Gaussian distribution.

The M step can be written as:

=>

=>

=>

, where, , and are the pdf and cdf of standard normal distribution.

Hence the E step is:

Similarly,

can be estimated by iteratively running the E and M step in the above algorithm with given .

**Supplementary method S3: BIC for selection of the number of Gaussian components**

Parameters can be estimated by iteratively running the estimation (E) and maximization (M) steps. In this study, is set for each gene as the logarithm of the minimal non-zero RPKM/FPKM/TPM value in the gene’s expression profile. The EM algorithm is conducted for = 1, …, 9 to fit the expression profile of each gene, and the that gives the best fit is selected according to the Bayesian Information Criterion (BIC):

where is the number of conditions. that minimizes the BIC will be selected.

**Figure S2**. QUBIC2 workflow. ***a***. Discretization of gene expression data from RNA-Seq. The LTMG model will be applied to fit each gene’s expression profile. A representing row for each gene will be generated with integers denoting the most likely component distribution that each value belongs to. Then this representing row will be split into multiple rows. Finally, a binary representing matrix will be generated; ***b***. Graph construction and seed selection. A weighted group will be constructed based on the representing matrix from a. by sorting the edges in decreasing order of their weight, and an initial seed list will be obtained. QUBIC2 will select a feasible seed from the list; ***c****.* Building an initial *Core* based on the selected seed. During seed expansion, QUBIC2 will search for genes with a higher weight than the seed. In the case of two genes having the same weight, the one with a higher KL score will be selected. Thus, gene k (KL=0.1914) instead of gene j (KL=0.0622) will be added to the *Core* first; ***d****.* Expanding core and determining the pool. QUBIC2 will expand the *Core* vertically and horizontally to recruit more genes and conditions under a preset consistency level, respectively. The intersected zone created by extended genes and conditions marks a *Dual* searching pool (brown box); ***e****.* *Dual* searching in the pool and outputing the bicluster with genes and conditions that come from the *Core* and *Dual* as final bicluster (red box); **f**. Statistical evaluation of identified biclusters based on either biological annotations or the size of the bicluster.

**Supplementary Method S4: Benchmarking algorithm/software**

Eight algorithms were used as benchmarking tools in the Functional Module Detection part, i.e., Bimax, ISA, FABIA, Plaid, QUBIC, BicMix, Runibic, and EBIC. These algorithms were selected after systematic consideration of 1) popularity; 2) ease of use; 3) performance (i.e., recommended in review works) and 4) recentness. A brief description of these algorithms is provided in Table S3.

**Table S3**. Summary of benchmarking algorithms

| **Algorithm** | **Description** | **Citations*** | **Published Year** | **Implementation** |
| --- | --- | --- | --- | --- |
| Bimax | a divide and conquer algorithm that seeks the rectangles of 1's in a binary matrix | 927 | 2006 | R package ‘biclust’ |
| ISA | a nondeterministic greedy algorithm that seeks biclusters with two symmetric requirements | 416 | 2002 | R package ‘isa2’ |
| FABIA | Factor analysis for bicluster acquisition (FABIA) modeling the data matrix **X** as the sum of p biclusters plus additive noise | 236 | 2010 | R package ‘fabia’ |
| Plaid | fits parameters to a generative model of the data known as the plaid model | 756 | 2002 | R package ‘biclust’ |
| QUBIC | a deterministic algorithm that reduces the biclustering problem to finding heavy subgraphs in a bipartite graph representation of the data | 202 | 2009 | R package ‘QUBIC’ |
| BicMix | a biclustering algorithm based on a Bayesian statistical model | 26 | 2016 | R package ‘BicMix’ |
| Runibic | parallel row-based biclustering | 8 | 2018 | R package ‘runibic’ |
| EBIC | a novel biclustering algorithm based on evolutionary computation; aims to detect order-preserving patterns | 9 | 2018 | C++ |

Note: The citations are counted as of July 2019 via Google scholar. We also tested S4VD (Sill, et al., 2011), Bi-Force (Sun, et al., 2014), GFA (Bunte, et al., 2016), COBRA (Chi, et al., 2017), Gracob(Alzahrani, et al., 2017) and MCbiclust(Bentham, et al., 2017), yet none of them could output biclusters in a reasonable time; thus we decided not to include them in the testing.

In the functional module section and cell classification section, each algorithm was run under different parameter combinations. The detailed information regarding parameter adjustment are listed as follows:

**Table S4**. Parameter ranges for each algorithm used in the functional module section

| **Algorithm** | **Parameters** | **Note** |
| --- | --- | --- |
| Bimax | ***minr*** ranges from 10~60(increment 5)  ***minc*** ranges from 10~45 (increment 5)  **number** set to100 | Needs discretized data as input. For each dataset, take the discretized data from QUBIC as input.  No recommendation provided by the author or biclust manual.  Default: ***minr***=2, ***minc***=2 |
| ISA | ***set.seed*** ranges from 10~600, increment 10 | ISA is stochastic, so/and setting different seeds may obtain different biclusters |
| FABIA | ***alpha*** ranges from 0~0.05, increament:0.01;  spl ranges from 0~2, increment 0.5;  ***spz*** ranges from0~2, increment 0.5;  ***cyc***=100, ***p***=100 | default: ***alpha***=0.1, ***spl*** =0, ***spz***=0.5, ***cyc***=500, ***p***=5 |
| Plaid | both ***row.release*** and ***col.release*** range from 0.5~0.7, increment be 0.05  ***max.layer*** 10~100 | for ***row.release*** and ***col.release***, 0.5~0.7 is the recommended range |
| QUBIC | ***f*** 0.1~1.0, increment 0.05  ***c*** 0.8~1.0, increment 0.05  ***k*** 3~23, increment 5 | default: ***f***=1.0, ***c***=0.95, ***k***=ncol/20 |
| QUBIC2 | ***f*** 0.25~1.0, increment 0.05  ***k*** 5~23, increment 5 |  |
| BicMix | ***nf*** *50~250, increment 50*  ***a*** *0.3~0.6, increment 0.1*  ***b*** *0.6~0.6, increment 0.1* | default: ***nf***=100, ***a***=0.5,***b***=0.5 |
| Runibic | ***t*** *0.6~1.0, increment 0.1*  ***f*** *0.2~1.0, increment 0.1* | default: ***t***=0.95, ***f***=1.0 |
| EBIC | ***n*** *1000~6000, increment 1000*  ***x*** *0.5~0.8, increment 0.1*  ***a*** *0.7~0.9, increment 0.05* | default: ***n***=5000, ***x***=0.75, ***a***=0.85 |

**Figure S3.** Averaged scores of each algorithm in terms of *f, d, v, p, r* on simulation, microarray, RNA-Seq, and scRNA-Seq data, respectively.

**Figure S4**. An overview of pathways that BC018_Q2 genes involved.

**Supplementary Method S5: Spearman correlation test**

QUBIC2 was run on the RNA-Seq data from *E. coli* under 70 parameter settings, and a correlation test was conducted between the knowledge-based *P*-value and the corresponding size-based *P*-values. Specifically, five sets of regulatory or metabolic pathways were extracted from four databases of *E. coli* (RegulonDB, KEGG, SEED (Overbeek, et al., 2005) and EcoCyc (Keseler, et al., 2017)) first. Given a group of up to 100 biclusters obtained under a parameter setting, six groups of *P*-values for all these biclusters were calculated, with five knowledge-based groups and one size-based group. A Spearman correlation test was conducted to investigate the rank-order correlation between size-based *P*-values and five groups of knowledge-based *P*-values. Five correlation coefficients (), which demonstrated the extent of correlation between size-based *P*-values and five biological knowledge-based *P*-values, as well as five corresponding *p*-values, were recorded from the test (Figure 2f). To investigate the effect of biclustering parameters on the correlation, the same steps were repeated for each group of biclusters obtained using 70 different parameter settings; thus, a total of 5 70 and *p*-values were obtained.

**Figure S5**. The relationship betweenbiclustering parameter f and correlation coefficient that indicates the association between biological knowledge-based *P*-value and size-based *P*-value. The blue line in each plot corresponds to the Loess smooth line.

**Supplementary Result S1: Analysis of time series Data**

We applied QUBIC2 on a time series lung scRNA-Seq data (GSE52583), which consists of 152 cells collected at E14, E16 and E18, respectively (Treutlein, et al., 2014). Five biclusters were identified, and three of them contained time-specific cells (Figure S7). Bicluster BC002 contained of cells exclusively from E14; bicluster BC003 contained cells that only from E16; and bicluster BC004 contained cells coming from E18. Functional enrichment analyses of the component genes from these three biclusters were carried out based on DAVID (Dennis, et al., 2003), and the results showed that genes in BC002 mainly related to cell cycle, cell division, and mitosis; BC003 genes were enriched with ribosome, translation, and structural constituent of ribosome; and spliceosome-related genes were grouped in BC004.

**Supplementary Note S3: Time complexity of QUBIC2**

QUBIC2 mainly consists of two steps: discretization and biclustering. The time complexity of each major step is given as follows:

Let , , and denote the number of genes, samples and the maximum output of biclusters.

I. Discretization

1). LTMG fitting. The LTMG will be individually fitted for each gene with a fixed number of iterations. The math operation of each iteration is, thus for genes and samples, the overall time complexity is .

2). discretization. The discretization will be individually conducted for each gene, and for each gene, the discretization is conducted over all samples with running time . Thus, the overall complexity is .

II. Biclustering.

1). graph construction:

2). edge sorting: should be at least ，since we just output the first biclusters, then it turns to , given o is a constant, that is .

3). looping step (at most loops)

a. build core bicluster: the time complexity of initiation of a bicluster is . Then repeat the multiple expansion steps. The time complexity for expansion is

b. core expansion step: the time complexity is

c. search dual step: the upper bound of the complexity is

d. the upper limit of repeating time is m, thus for each looping, the time complexity is still .

Therefore, the upper limit of time complexity for the looping step is .

In summary, the final complexity for the biclustering step is and the total complexity of QUBIC2 is

**Figure S6.** Running time of nine biclustering tools on eight real datasets. **a**. Running time in regular scale. The inserted table shows the running time of QUBIC2_1 ; **b.** Running time in log10 scale. Note that QUBIC2_1 denotes the running time for discretization + biclustering, and QUBIC2_2 refers to the time for biclustering only.

**Figure S7**. Visualization of three biclusters (BC002, BC003, and BC004) identified by QUBIC2 from time series scRNA-Seq dataset GSE52583.

**References**

Alzahrani, M.*, et al.* Gracob: a novel graph-based constant-column biclustering method for mining growth phenotype data. *Bioinformatics* 2017:btx199.

Bentham, R.B., Bryson, K. and Szabadkai, G. MCbiclust: a novel algorithm to discover large-scale functionally related gene sets from massive transcriptomics data collections. *Nucleic Acids Research* 2017;45(15):8712-8730.

Bunte, K.*, et al.* Sparse group factor analysis for biclustering of multiple data sources. *Bioinformatics* 2016;32(16):2457-2463.

Chi, E.C., Allen, G.I. and Baraniuk, R.G. Convex biclustering. *Biometrics* 2017;73(1):10-19.

Dennis, G.*, et al.* DAVID: database for annotation, visualization, and integrated discovery. *Genome biology* 2003;4(9):R60.

Finak, G.*, et al.* MAST: a flexible statistical framework for assessing transcriptional changes and characterizing heterogeneity in single-cell RNA sequencing data. *Genome biology* 2015;16(1):278.

Keseler, I.M.*, et al.* The EcoCyc database: reflecting new knowledge about Escherichia coli K-12. *Nucleic acids research* 2017;45(Database issue):D543-D550.

Li, W.V. and Li, J.J. An accurate and robust imputation method scImpute for single-cell RNA-seq data. *Nature communications* 2018;9(1):997.

Overbeek, R.*, et al.* The Subsystems Approach to Genome Annotation and its Use in the Project to Annotate 1000 Genomes. *Nucleic acids research* 2005;33(17):5691-5702.

Sill, M.*, et al.* Robust biclustering by sparse singular value decomposition incorporating stability selection. *Bioinformatics* 2011;27(15):2089-2097.

Sun, P.*, et al.* Bi-Force: large-scale bicluster editing and its application to gene expression data biclustering. *Nucleic acids research* 2014;42(9):e78-e78.

Tirosh, I.*, et al.* Dissecting the multicellular ecosystem of metastatic melanoma by single-cell RNA-seq. *Science* 2016;352(6282):189-196.

Treutlein, B.*, et al.* Reconstructing lineage hierarchies of the distal lung epithelium using single-cell RNA-seq. *Nature* 2014;509:371.

Wu, Z.*, et al.* Two-phase differential expression analysis for single cell RNA-seq. *Bioinformatics* 2018;34(19):3340-3348.
